# Supplementary material
Source: PubMed Central journal article supplement (PMC6668692)
Supplement: jci-129-128562-s336.pdf [file jci-129-128562-s336.pdf]

# Supplemental Figures

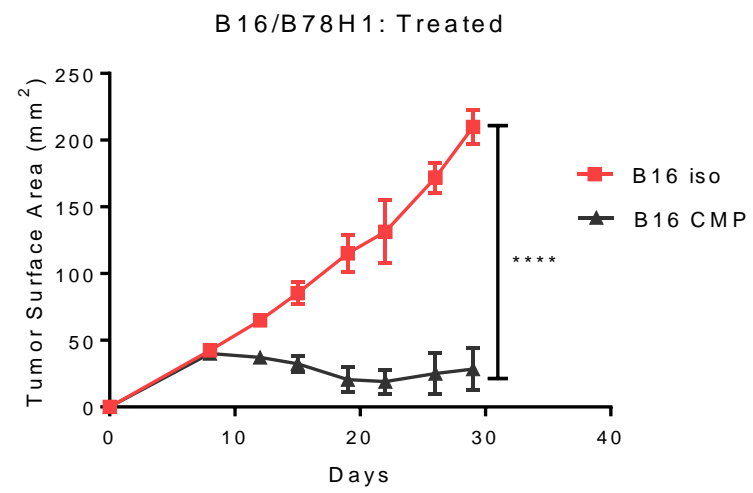

Figure S1: Average tumor growth curve of treated B16F10 tumors in animals bearing distant B78H1 tumors.

| HGNCSymbol | Gene Symbol   | P.Value  | adj.P.Val | logFC    | ENTREZID |  |
|------------|---------------|----------|-----------|----------|----------|--|
| GZMK       | Gzmk          | 6.62E-07 | 0.019109  | 3.067493 | 3003     |  |
| ADAM8      | Adam8         | 5.06E-05 | 0.063651  | 3.123511 | 101      |  |
| ANPEP      | Anpep         | 3.65E-05 | 0.063651  | 2.428938 | 290      |  |
| ASS1       | Ass1          | 3.45E-05 | 0.063651  | 1.581637 | 445      |  |
| ATP1A3     | Atp1a3        | 4.13E-05 | 0.063651  | 2.016082 | 478      |  |
| ATP6V0D2   | Atp6v0d2      | 7.24E-06 | 0.063651  | 3.389887 | 245972   |  |
| C3         | C3            | 3.12E-05 | 0.063651  | 4.104003 | 718      |  |
| CCL23      | Ccl6          | 1.84E-05 | 0.063651  | 2.385635 | 6368     |  |
| CCL26      | Ccl8          | 1.39E-05 | 0.063651  | 3.429348 | 10344    |  |
| CCL5       | Ccl5          | 3.65E-05 | 0.063651  | 2.877596 | 6352     |  |
| CFP        | Cfp           | 6.86E-05 | 0.063651  | 2.432155 | 5199     |  |
| CSF2RB     | Csf2rb2       | 2.64E-05 | 0.063651  | 2.922136 | 1439     |  |
| FOLR2      | Folr2         | 5.77E-05 | 0.063651  | 2.144152 | 2350     |  |
| IL1RN      | Il1rn         | 7.66E-05 | 0.063651  | 3.278842 | 3557     |  |
| ITGB1BP2   | Irgb1bp2      | 5.70E-05 | 0.063651  | 1.929512 | 26548    |  |
| LGALS3     | Lgals3        | 1.77E-05 | 0.063651  | 2.459773 | 3958     |  |
| MAFB       | Mafb          | 6.61E-05 | 0.063651  | 2.270724 | 9935     |  |
| MFHAS1     | Mfhas1        | 2.88E-05 | 0.063651  | 2.084097 | 9258     |  |
| MMP19      | Mmp19         | 2.30E-05 | 0.063651  | 2.293279 | 4327     |  |
| NFATC1     | Nfatc1        | 5.33E-05 | 0.063651  | 1.840636 | 4772     |  |
| NOS2       | Nos2          | 1.66E-05 | 0.063651  | 4.900492 | 4843     |  |
| PTAFR      | Ptafr         | 7.72E-05 | 0.063651  | 3.035468 | 5724     |  |
| SH2B2      | Sh2b2         | 1.00E-05 | 0.063651  | 2.141262 | 10603    |  |
| TARM1      | Tarm1         | 5.05E-05 | 0.063651  | 3.125284 | 441864   |  |
| TFEC       | Tfec          | 6.46E-05 | 0.063651  | 1.900903 | 22797    |  |
| TREM2      | Trem2         | 7.53E-05 | 0.063651  | 2.849572 | 54209    |  |
| XDH        | Xdh           | 7.03E-05 | 0.063651  | 2.342691 | 7498     |  |
| CLEC6A     | Clec4n        | 9.85E-05 | 0.075831  | 4.011309 | 93978    |  |
| LILRB4     | Gm15922       | 9.48E-05 | 0.075831  | 2.599271 | 11006    |  |
| CCL11      | Ccl11         | 0.000114 | 0.078015  | 2.558672 | 6356     |  |
| FLRT2      | Flrt2         | 0.000107 | 0.078015  | 1.907153 | 23768    |  |
| C1orf162   | I830077J02Rik | 0.000152 | 0.078749  | 1.318517 | 128346   |  |
| CCL23      | Ccl9          | 0.00012  | 0.078749  | 2.580178 | 6368     |  |
| CD52       | Cd52          | 0.00014  | 0.078749  | 2.221747 | 1043     |  |
| CLEC4D     | Clec4d        | 0.000164 | 0.078749  | 5.18802  | 338339   |  |
| CYBA       | Cyba          | 0.000153 | 0.078749  | 1.69344  | 1535     |  |
| FMNL1      | Fmnl1         | 0.000161 | 0.078749  | 1.739132 | 752      |  |
| GLRX       | Glrx          | 0.000151 | 0.078749  | 1.850243 | 2745     |  |
| GSTK1      | Gstk1         | 0.00015  | 0.078749  | 1.505521 | 373156   |  |
| IL21R      | Il21r         | 0.000154 | 0.078749  | 2.60111  | 50615    |  |
| MARCO      | Marco         | 0.000128 | 0.078749  | 2.569466 | 8685     |  |
| PI16       | Pi16          | 0.000139 | 0.078749  | 2.568487 | 221476   |  |
| S1PR4      | S1pr4         | 0.000165 | 0.078749  | 1.686857 | 8698     |  |
| CD3D       | Cd3d          | 0.000177 | 0.079788  | 2.277825 | 915      |  |
| FGR        | Fgr           | 0.000181 | 0.080455  | 2.310856 | 2268     |  |
| CLEC10A    | Mgl2          | 0.000196 | 0.082172  | 1.335802 | 10462    |  |
| IGSF6      | Igsf6         | 0.000199 | 0.082172  | 2.37001  | 10261    |  |
| SLAMF6     | Slamf6        | 0.000199 | 0.082172  | 2.697009 | 114836   |  |
| C1QC       | C1qc          | 0.000203 | 0.082475  | 1.959845 | 714      |  |
| CLEC4E     | Clec4e        | 0.00021  | 0.083096  | 4.952239 | 26253    |  |
| SLC7A2     | Slc7a2        | 0.00021  | 0.083096  | 2.784737 | 6542     |  |
| LILRA4     | Pirb          | 0.000218 | 0.085055  | 2.728993 | 23547    |  |
| B4GALNT1   | B4galnt1      | 0.00023  | 0.088485  | 1.895877 | 2583     |  |
| CD84       | Cd84          | 0.000238 | 0.090502  | 2.365296 | 8832     |  |
| FERMT3     | Fermt3        | 0.000264 | 0.094703  | 1.919157 | 83706    |  |
| CSTB       | Cstb          | 0.000305 | 0.096298  | 1.203798 | 1476     |  |
| NFAM1      | Nfam1         | 0.000287 | 0.096298  | 2.014159 | 150372   |  |
| SFRP4      | Sfrp4         | 0.000291 | 0.096298  | 2.659627 | 6424     |  |
| THY1       | Thy1          | 0.000307 | 0.096298  | 2.500864 | 7070     |  |
| TNFAIP2    | Tnfaip2       | 0.000307 | 0.096298  | 2.069053 | 7127     |  |
| COX6A2     | Cox6a2        | 0.000314 | 0.097269  | 2.151099 | 1339     |  |
| CTSD       | Ctsd          | 0.000323 | 0.097269  | 1.187588 | 1509     |  |
| IL2RG      | Il2rg         | 0.000324 | 0.097269  | 2.877191 | 3561     |  |
| CACNB1     | Cacnb1        | 0.000359 | 0.098224  | 2.259612 | 782      |  |
| CD300LF    | Cd300ld       | 0.000335 | 0.098224  | 2.398153 | 146722   |  |
| DPEP2      | Dpep2         | 0.000375 | 0.098224  | 1.954277 | 64174    |  |
| EMX2       | Emx2          | 0.000365 | 0.098224  | 1.107609 | 2018     |  |
| IL7R       | Il7r          | 0.000341 | 0.098224  | 3.09894  | 3575     |  |
| LPAR1      | Lpar1         | 0.000353 | 0.098224  | 2.026258 | 1902     |  |
| PLA2G7     | Pla2g7        | 0.00035  | 0.098224  | 4.154612 | 7941     |  |
| TNFRSF1B   | Tnfrsf1b      | 0.000345 | 0.098224  | 2.779606 | 7133     |  |
| WAS        | Was           | 0.000337 | 0.098224  | 1.537643 | 7454     |  |
| CD7        | Cd7           | 0.000379 | 0.098422  | 2.085454 | 924      |  |

Table S1: The significantly differentially expressed genes (N = 73) that are increased upon CMP treatment as compared to isotype control (logFC > 0) evaluated in Figure 6A and as described in the Methods section.
